# Supplementary material for: A prospective evaluation of a breast cancer prognosis signature in the observational RASTER study
Source: PubMed Central journal article supplement (PMC3734625; doi:10.1002/ijc.28082), 2013-03-04
Supplement: ijc0133-0929-sd1.pdf [file ijc0133-0929-sd1.pdf]

Supplementary figure 1. Kaplan-Meier plots for DDFS, DRFI and OS by 70-gene signature or AOL

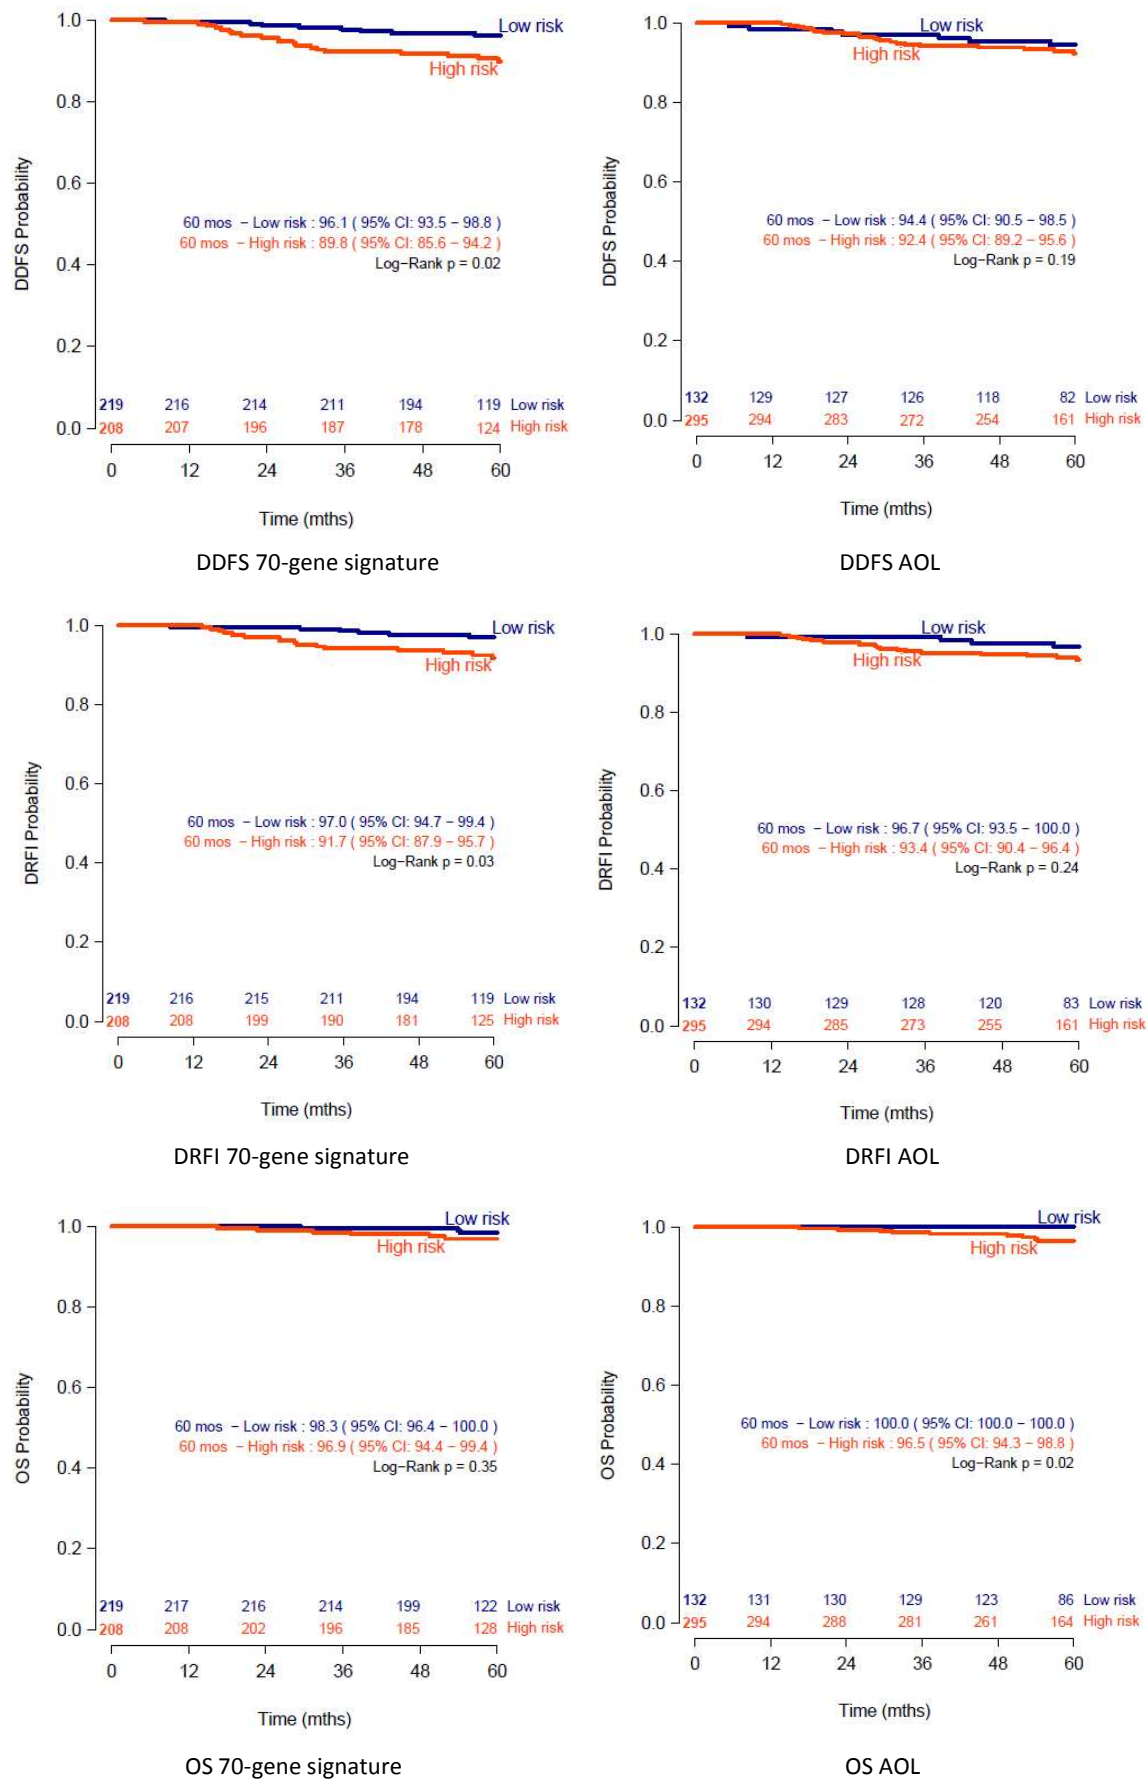

**Supplementary table 1.** Clinico-pathological characteristics by 70-gene signature result

|                           |                | 70-gene signature     | 70-gene signature      | <b>Total</b> |
|---------------------------|----------------|-----------------------|------------------------|--------------|
|                           |                | <b>Low Risk (219)</b> | <b>High Risk (208)</b> |              |
| <b>Age</b>                | <35            | 7 (3%)                | 19 (9%)                | 26 (6%)      |
|                           | 36-40          | 14 (6%)               | 27 (13%)               | 41 (10%)     |
|                           | 41-45          | 37 (17%)              | 47 (23%)               | 84 (20%)     |
|                           | 46-50          | 86 (39%)              | 55 (26%)               | 141 (33%)    |
|                           | 51-55          | 56 (26%)              | 44 (21%)               | 100 (23%)    |
|                           | >55            | 19 (9%)               | 16 (8%)                | 35 (8%)      |
| <b>pT (TNM)</b>           | pT1 (<20mm)    | 177 (81%)             | 124 (60%)              | 301 (70%)    |
|                           | pT2 (>20-50mm) | 42 (19%)              | 83 (40%)               | 125 (29%)    |
|                           | pT3 (>50mm)    | 0 (0%)                | 1 (0.5%)               | 1 (0.2%)     |
| <b>Histological grade</b> | Good           | 72 (33%)              | 15 (7%)                | 87 (20%)     |
|                           | Intermediate   | 131 (60%)             | 73 (35%)               | 204 (48%)    |
|                           | Poor           | 16 (7%)               | 120 (58%)              | 136 (32%)    |
| <b>Histological type</b>  | Ductal         | 162 (74%)             | 183 (88%)              | 345 (81%)    |
|                           | Lobular        | 38 (17%)              | 9 (4%)                 | 47 (11%)     |
|                           | Other          | 16 (7%)               | 15 (7%)                | 31 (7%)      |
|                           | Unknown        | 3 (1%)                | 1 (0.5%)               | 4 (1%)       |
| <b>ER status</b>          | Negative       | 3 (1%)                | 82 (39%)               | 85 (20%)     |
|                           | Positive       | 216 (99%)             | 126 (61%)              | 342 (80%)    |
| <b>PgR status</b>         | Negative       | 33 (15%)              | 100 (48%)              | 133 (31%)    |
|                           | Positive       | 186 (85%)             | 107 (51.5%)            | 293 (68.6%)  |
|                           | Unknown        | 0 (0%)                | 1 (0.5%)               | 1 (0.2%)     |
| <b>HER2 status</b>        | Negative       | 197 (90%)             | 161 (77%)              | 358 (84%)    |
|                           | Positive       | 9 (4%)                | 39 (19%)               | 48 (11%)     |
|                           | Unknown        | 13 (6%)               | 8 (4%)                 | 21 (5%)      |
| <b>CBO 2004</b>           | Low Risk       | 167 (76%)             | 76 (37%)               | 243 (57%)    |
|                           | High Risk      | 52 (24%)              | 132 (63%)              | 184 (43%)    |
| <b>Adjuvant! Online</b>   | Low Risk       | 95 (43%)              | 37 (18%)               | 132 (31%)    |
|                           | High Risk      | 124 (57%)             | 171 (82%)              | 295 (69%)    |
| <b>Chemotherapy</b>       | None           | 186 (85%)             | 39 (19%)               | 225 (53%)    |
|                           | FEC/FAC*       | 25 (11%)              | 108 (52%)              | 133 (31%)    |
|                           | AC**           | 7 (3,5%)              | 26 (12%)               | 33 (8%)      |
|                           | TAC***         | 0 (0%)                | 20 (10%)               | 20 (5%)      |
|                           | AC-Paclitaxel  | 1 (0,5%)              | 15 (7%)                | 16 (4%)      |

\*Chemotherapy regimen consisting of fluorouracil, cyclophosphamide and either adriamycine or epirubicine

\*\* Adriamycine and cyclophosphamide

\*\*\* Docetaxel, adriamycine and cyclophosphamide

**Supplementary table 2.** Characteristics of patients with one or more events

| Type of Event                            | IHC subtype                     | 70-gene signature | 70-gene signature |
|------------------------------------------|---------------------------------|-------------------|-------------------|
|                                          |                                 | low risk          | high risk         |
| Locoregional event                       | ER+HER2-                        | 4 <sup>‡</sup>    | 3                 |
|                                          | ER+HER2+                        | 0                 | 0                 |
|                                          | ER-HER2-                        | 0                 | 1                 |
|                                          | ER-HER2+                        | 0                 | 1                 |
|                                          | ER+HER2 unknown                 | 0                 | 1                 |
|                                          | Median age at diagnosis (range) | 42 (27-46)        | 49 (33-59)        |
| Distant metastasis event                 | ER+HER2-                        | 6*                | 5                 |
|                                          | ER+HER2+                        | 1*                | 2 <sup>#</sup>    |
|                                          | ER-HER2-                        | 0                 | 8                 |
|                                          | ER-HER2+                        | 0                 | 2                 |
|                                          | Median age at diagnosis (range) | 46 (39-57)        | 50 (34-59)        |
|                                          | Breast cancer-specific death    | ER+HER2-          | 2                 |
| ER+HER2+                                 |                                 | 0                 | 0                 |
| ER-HER2-                                 |                                 | 0                 | 4                 |
| ER-HER2+                                 |                                 | 0                 | 1                 |
| Median age at diagnosis (range)          |                                 | ND (46-51)        | 51 (45-59)        |
| Death due to other causes                |                                 |                   | 2 <sup>†</sup>    |
| Contralateral breast cancer <sup>Δ</sup> |                                 | 10 <sup>‡</sup>   | 4                 |
| Second primary tumor                     |                                 | 2                 | 7                 |

IHC = immunohistochemistry

<sup>‡</sup>One patient first developed an ipsilateral axillary recurrence, 10 months later followed by a contralateral breast cancer.

\*Of these 7 70-gene signature<sup>®</sup>low risk cases, 4 cases were also low risk according to AOL. Of the three AOL high risk cases, only one did not receive any form of AST. This case developed a recurrence at 82 months of follow-up.

<sup>#</sup>One case was AOL low risk and 70-gene signature high risk. No AST was administered. She had a recurrence at 5 months of follow-up.

<sup>†</sup>One patient died due to a cardiac cause. This patient had only received adjuvant radiotherapy of the breast. She had no signs of breast cancer recurrence. She had had an ER+HER2- breast cancer at the age of 57. The second patient died of right-sided primary lung cancer, proven by histology and ER negative immunohistochemistry, two years after the primary diagnosis of invasive lobular breast cancer, ER+HER2-. She had only received adjuvant radiotherapy on the right breast after breast conserving therapy. She had stopped smoking one year before the diagnosis of breast cancer.

<sup>Δ</sup>Out of patients with low risk 70-gene signature, only one had received AST. Of 4 high risk 70-gene signature patients, 3 had received AST. One AML (no adjuvant chemotherapy) and one lung cancer in the 70-gene signature low risk group. Four lung cancers, 2 colorectal cancers and 1 carcinoid in the 70-gene signature high risk group.

**Supplementary table 3. Kaplan-Meier risk estimations for DRFI using different AOL cut-offs**

| <b>AOL cut-off 10-years OS</b> | <b>AOL</b> | <b>Number of patients</b> | <b>5-years DRFI (%) (95% CI)</b> |
|--------------------------------|------------|---------------------------|----------------------------------|
| 85%                            | Low        | 253 (59.3%)               | 97 (95.1-99.5)                   |
|                                | High       | 174 (40.7%)               | 90 (85.8-94.9)                   |
| 90%                            | Low        | 132 (30.9%)               | 97 (93.5-100)                    |
|                                | High       | 295 (69.1%)               | 93 (90.4-96.4)                   |
| 88% (ER+) / 92% (ER-)          | Low        | 194 (45.4%)               | 98 (88.0-95.0)                   |
|                                | High       | 233 (54.6%)               | 92 (96.0-100)                    |
| 95%                            | Low        | 19 (4.4%)                 | 100 (100-100)                    |
|                                | High       | 408 (95.6%)               | 94 (91.8-96.6)                   |
